# Supplementary figures and images for: An uneven distribution of strontium in the coccolithophore Scyphosphaera apsteinii revealed by nanoscale X-ray fluorescence tomography
Source: Royal Society of Chemistry journal article supplement (doi:10.1039/d3em00509g), 2024-01-01

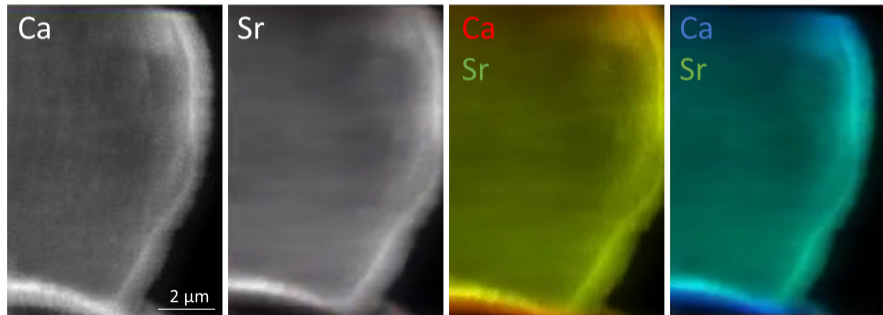

Supplement: d3em00509g10.pdf [file d3em00509g10.pdf]

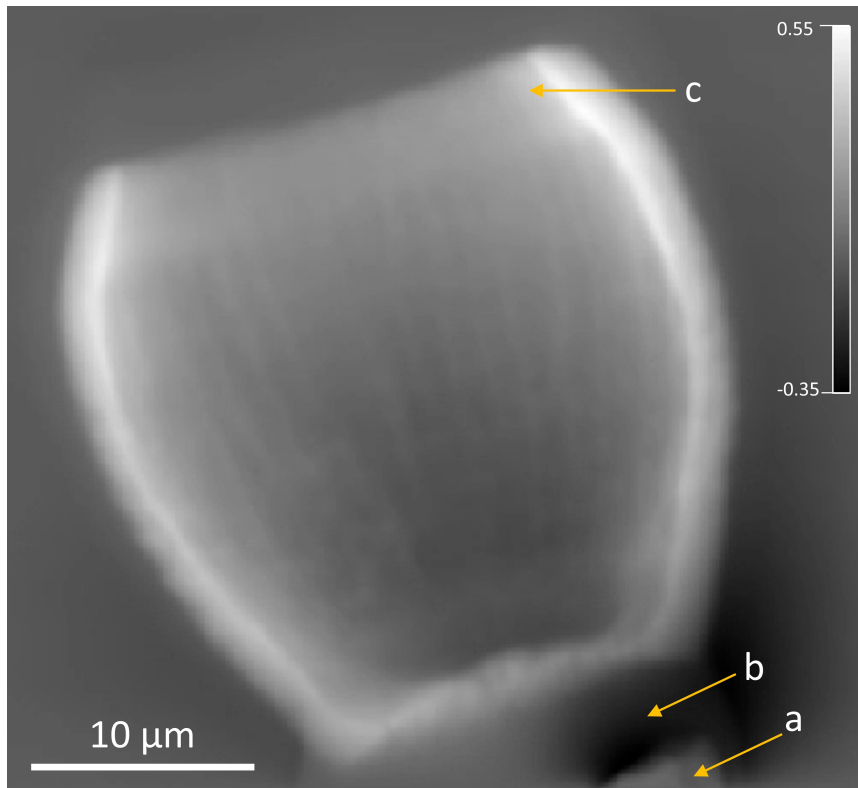

Supplement: d3em00509g2.pdf [file d3em00509g2.pdf]

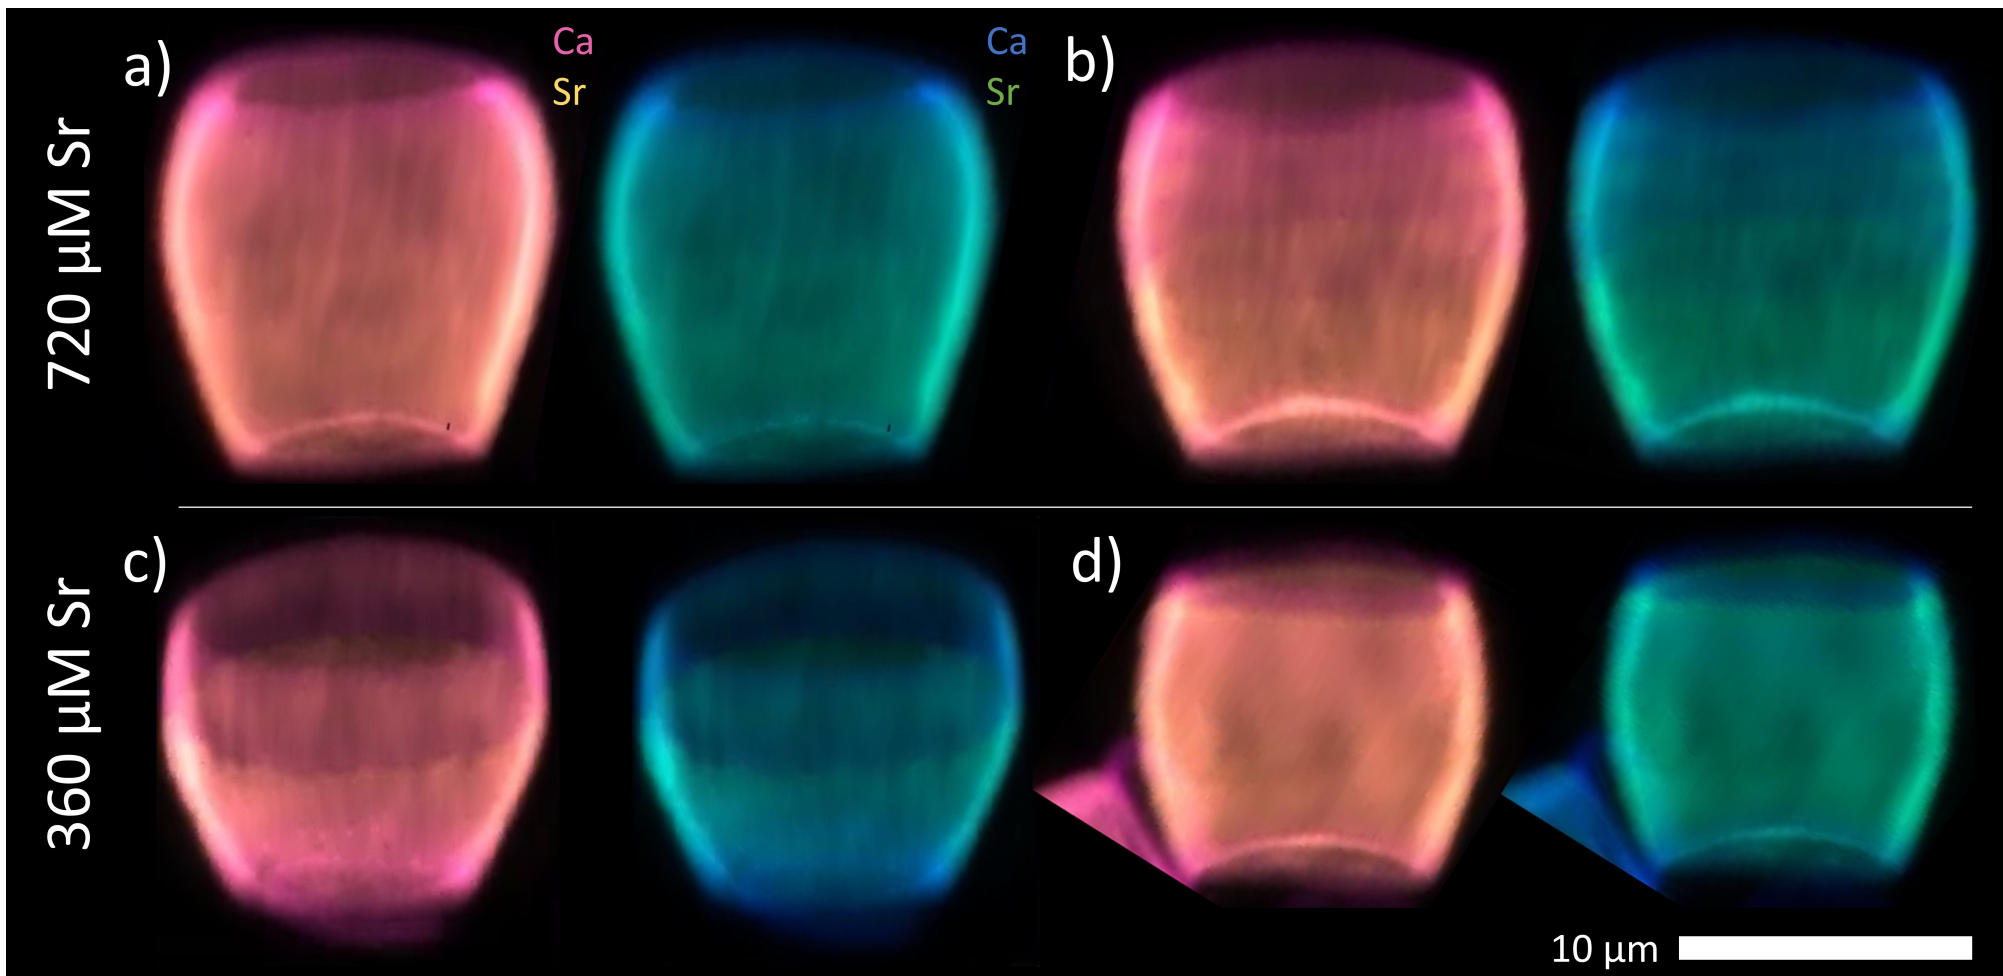

Supplement: d3em00509g3.pdf [file d3em00509g3.pdf]

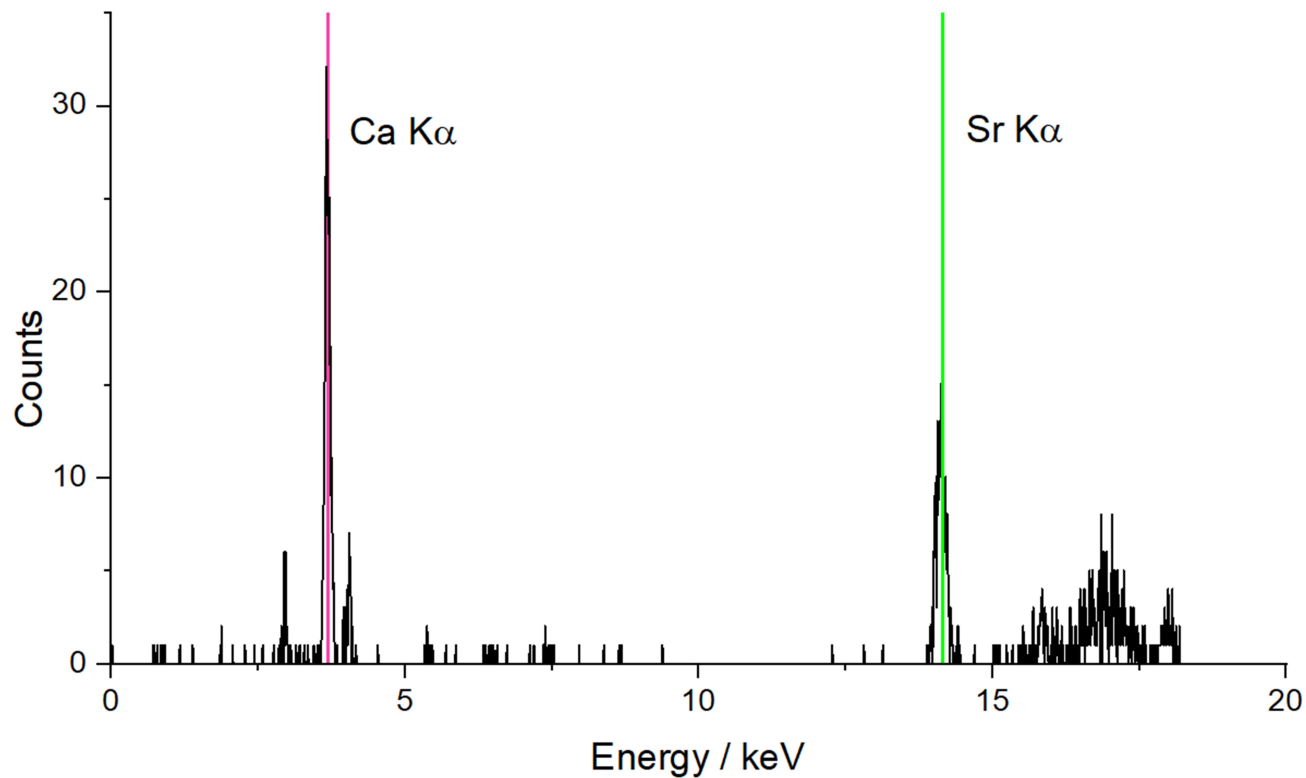

Supplement: d3em00509g7.pdf [file d3em00509g7.pdf]

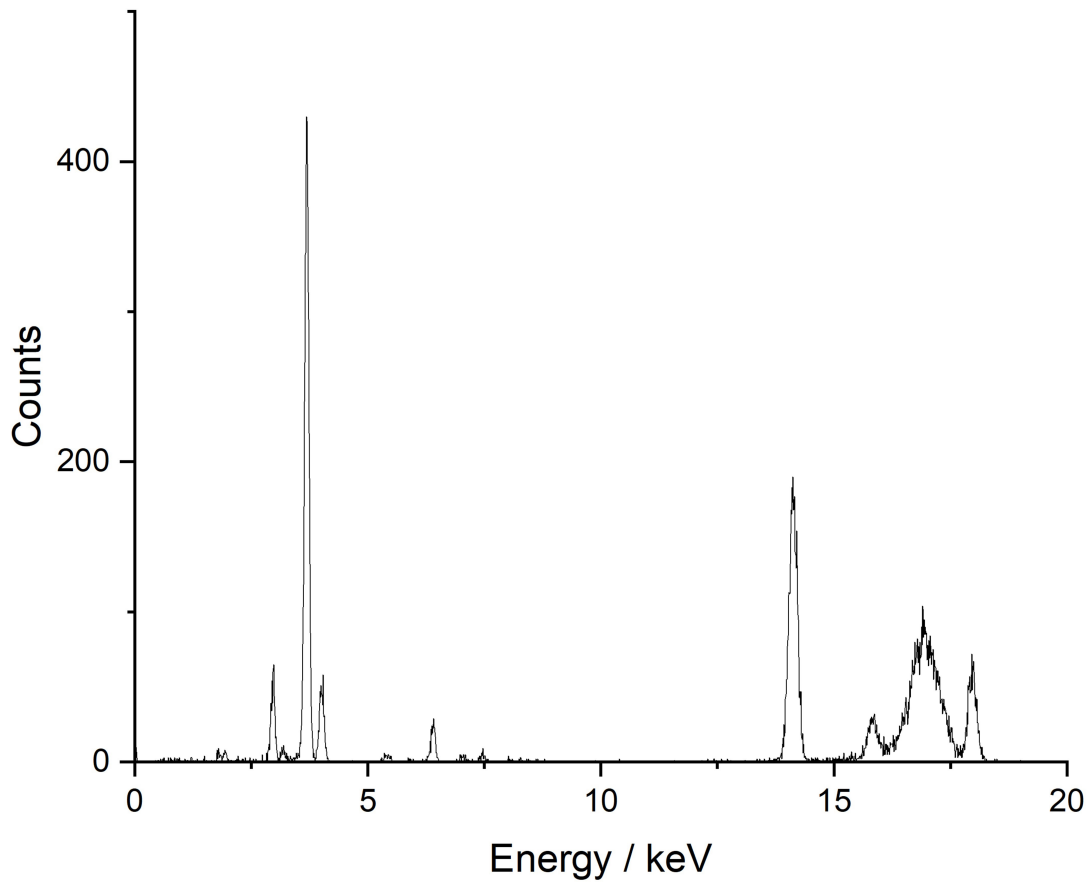

Supplement: d3em00509g8.pdf [file d3em00509g8.pdf]
